# Supplementary material for: Ebolavirus Nucleoprotein C-Termini Potently Attract Single Domain Antibodies Enabling Monoclonal Affinity Reagent Sandwich Assay (MARSA) Formulation
Source: PubMed Central journal article supplement (PMC3618483; doi:10.1371/journal.pone.0061232), 2013-04-05

**Figure S2**

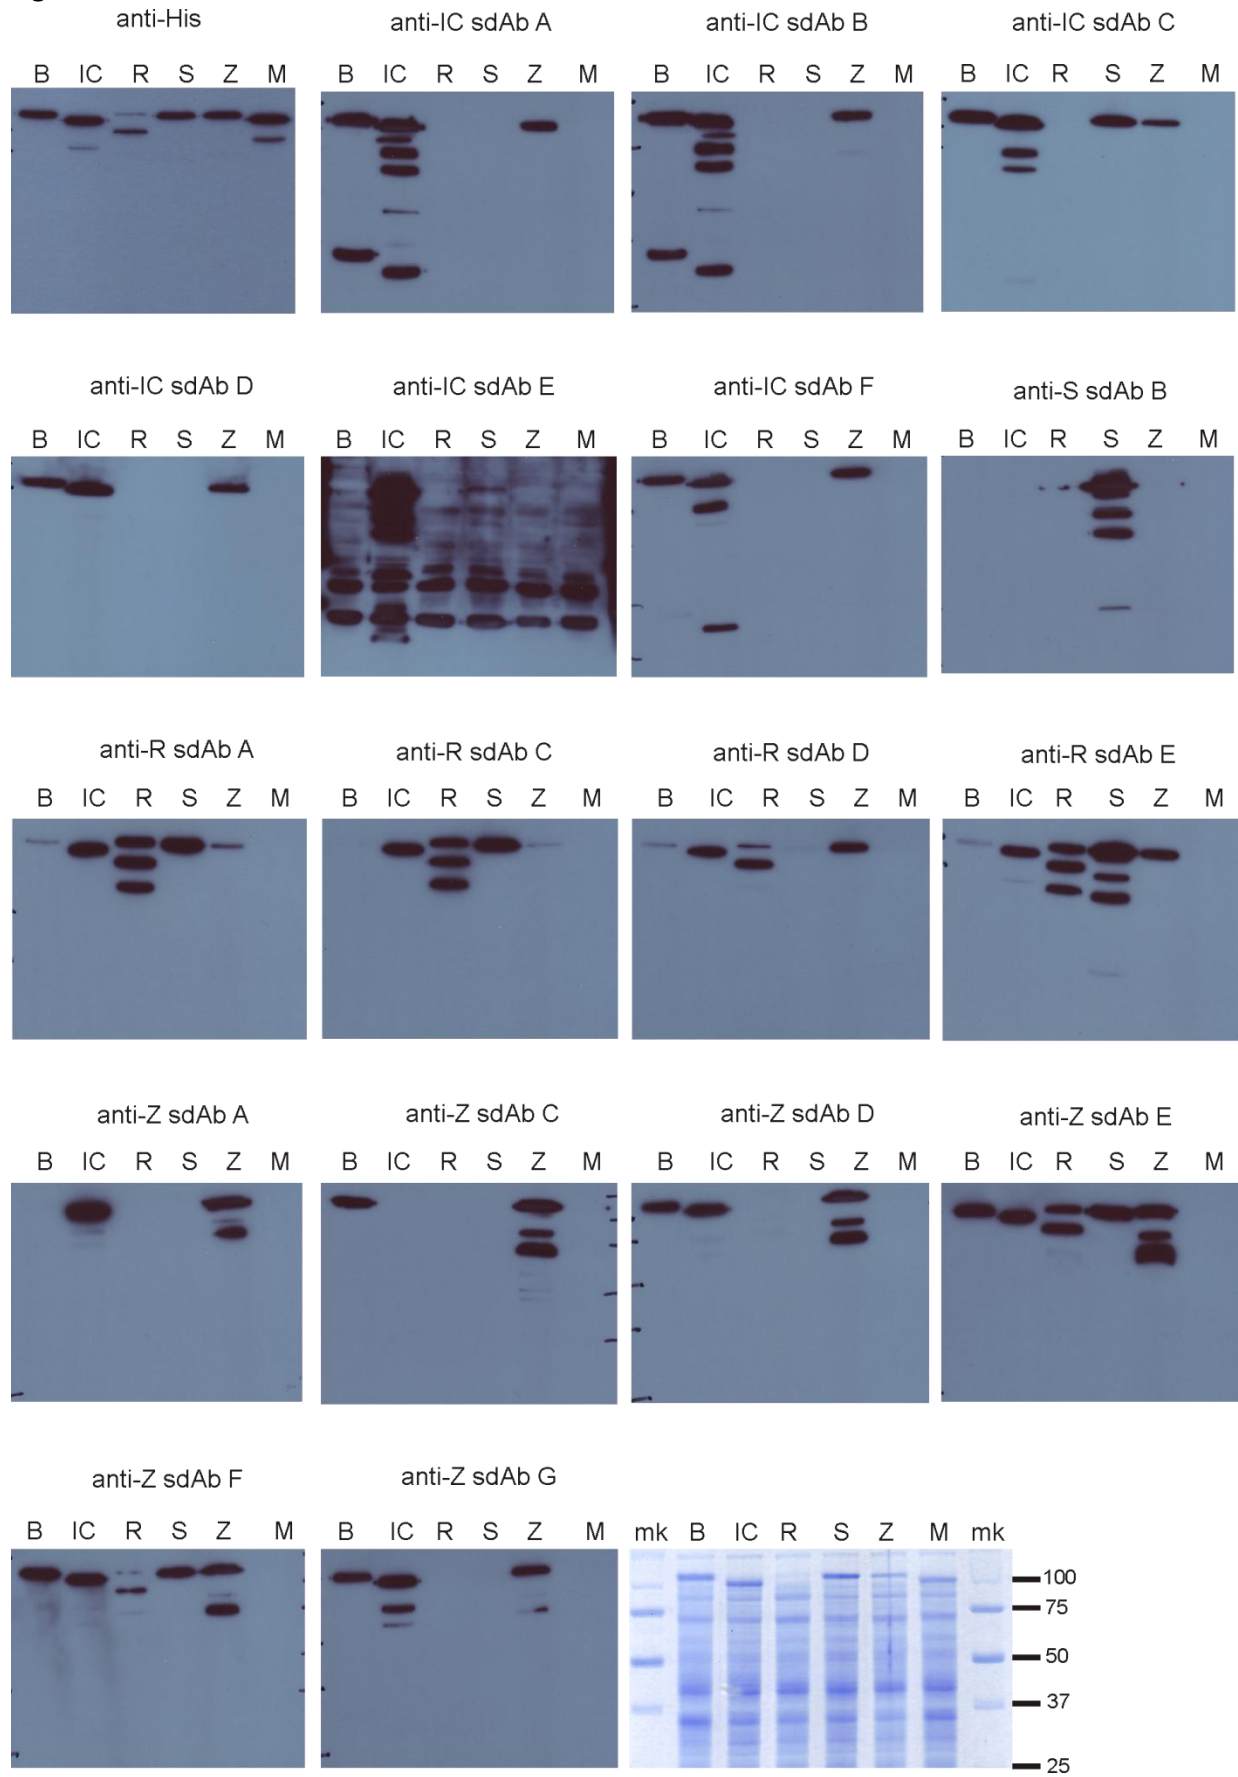

Supplement: pone.0061232.s002.pdf [file pone.0061232.s002.pdf]
