# Supplementary material for: Ebolavirus Nucleoprotein C-Termini Potently Attract Single Domain Antibodies Enabling Monoclonal Affinity Reagent Sandwich Assay (MARSA) Formulation
Source: PubMed Central journal article supplement (PMC3618483; doi:10.1371/journal.pone.0061232), 2013-04-05
Supplement: pone.0061232.s004.pdf [file pone.0061232.s004.pdf]

**Table S1**

| <b>Ebolavirus Species</b> | <b>sdAb</b> | <b>Frequency</b> |
|---------------------------|-------------|------------------|
| <b>Reston</b>             | A           | 3/24             |
|                           | C           | 10/24            |
|                           | D           | 10/24            |
|                           | E           | 1/24             |
| <b>Sudan</b>              | A (B)       | 24/24            |
| <b>Ivory Coast</b>        | A           | 5/26             |
|                           | B           | 11/26            |
|                           | C           | 6/26             |
|                           | D           | 1/26             |
|                           | E           | 1/26             |
|                           | F           | 2/26             |
| <b>Zaire</b>              | A           | 3/24             |
|                           | C           | 11/24            |
|                           | D           | 2/24             |
|                           | E           | 1/24             |
|                           | F           | 3/24             |
|                           | G           | 1/24             |
|                           | (B)         | (3/24)           |
